# Supplementary material
Source: PubMed Central journal article supplement (PMC2907441)
Supplement: NIHMS186545-supplement-supplemental.pdf [file NIHMS186545-supplement-supplemental.pdf]

**Web-based Supplementary Materials for  
 ”Spatial cluster detection for weighted outcomes using cumulative  
 geographic residuals”**

by

Andrea J. Cook, Yi Li, David Arterburn, and Ram C. Tiwari

## Web Appendix

**Asymptotic Equivalence of  $Z_{loc}(x_1, x_2|b)$  and  $\hat{Z}_{loc}(x_1, x_2|b)$ , given the observed  
 data, for the Cumulative Weighted Geographic Residual**

We will begin by first showing the asymptotic distribution of  $Z_{loc}(x_1, x_2|b)$  assuming the model for the data is,

$$Y_i = \mathbf{X}_i\boldsymbol{\beta} + e_i \quad \text{where } e_i \stackrel{ind}{\sim} (0, \sigma^2/w_i).$$

Consider the following one-term Taylor series expansion of  $Z_{loc}(x_1, x_2|b)$  at  $\boldsymbol{\beta}$ ,

$$\begin{aligned} Z_{loc}(x_1, x_2|b) &= \frac{1}{\sqrt{n}} \sum_{i=1}^n W_i(x_1, x_2|r_i, s_i, b)\hat{e}_i \\ &= \frac{1}{\sqrt{n}} \sum_{i=1}^n W_i(x_1, x_2|r_i, s_i, b)(Y_i - \mathbf{X}_i\boldsymbol{\beta}) \\ &\quad - \frac{1}{\sqrt{n}} \sum_{i=1}^n W_i(x_1, x_2|r_i, s_i, b)\mathbf{X}_i(\hat{\boldsymbol{\beta}} - \boldsymbol{\beta}) \\ &= \frac{1}{\sqrt{n}} \sum_{i=1}^n W_i(x_1, x_2|r_i, s_i, b)e_i \\ &\quad - \frac{1}{n} \left( \sum_{i=1}^n W_i(x_1, x_2|r_i, s_i, b)\mathbf{X}_i \right) \left[ \sqrt{n}(\hat{\boldsymbol{\beta}} - \boldsymbol{\beta}) \right] + o_p(1). \end{aligned} \tag{1}$$

where  $e_i = Y_i - \mathbf{X}_i\boldsymbol{\beta}$ .

First, we will prove  $Z_{loc}(x_1, x_2|b)$  is tight and then establish its asymptotic distribution. Throughout this proof we assume that  $X_i$ ,  $r_i$ , and  $s_i$  are bounded. Start with the first part of  $Z_{loc}(x_1, x_2|b)$ , that is, let  $P_{1i}(x_1, x_2|b) = W_i(x_1, x_2|r_i, s_i, b)e_i$ . Note that  $P_{1i}(x_1, x_2|b)$  is two monotone functions element-wise in  $(x_1, x_2)$ , because  $P_{1i}(x_1, x_2|r_i, s_i, b) = f(x_1|s_i, b) *$

$g(x_2|r_i, b)$  and  $f(x_1|s_i, b) = I(x_1 < b \leq x_1 + b)$  and  $g(x_2|r_i, b) = I(x_2 < b \leq x_2 + b)\hat{e}_i w_i$  are monotone functions on  $x_1$  and  $x_2$ , respectively. Therefore, the processes  $\{P_{1i}(x_1, x_2|b); i = 1, \dots, n\}$  are "manageable" (Pollard, 1990 and Billias et al., 1997). It then follows from the functional central limit theorem, that  $\frac{1}{\sqrt{n}} \sum_{i=1}^n P_{1i}(x_1, x_2|b)$  goes to a zero-mean Gaussian distribution as  $n \rightarrow \infty$ , since  $E(e_i) = 0$ , and is tight.

For the second part we start by defining the asymptotic distribution of  $\sqrt{n}(\hat{\boldsymbol{\beta}} - \boldsymbol{\beta})$ . It has been shown that, for the general exponential family, as long as the conditional mean of  $Y_i$ ,  $E(Y_i; \mathbf{X}_i)$ , is correctly linked to  $\mathbf{X}_i$  through a link function  $g(\cdot)$  with

$$g\{E(Y_i; \mathbf{X}_i)\} = \mathbf{X}_i \boldsymbol{\beta},$$

that,

$$\sqrt{n}(\hat{\boldsymbol{\beta}} - \boldsymbol{\beta}) \rightarrow N_p(\mathbf{0}, \mathbf{A}^{-1}(\boldsymbol{\beta})\mathbf{B}(\boldsymbol{\beta})\mathbf{A}^{-1}(\boldsymbol{\beta}))$$

where

$$\mathbf{A}(\boldsymbol{\beta}) = p \lim_{n \rightarrow \infty} \left[ \frac{1}{n} \mathbf{I}(\boldsymbol{\beta}) \right],$$

$\mathbf{B}(\boldsymbol{\beta}) = p \lim_{n \rightarrow \infty} \left[ \frac{1}{n} \sum_{i=1}^n U_{i\boldsymbol{\beta}}(\boldsymbol{\beta}) U_{i\boldsymbol{\beta}}^T(\boldsymbol{\beta}) \right]$  (Liang and Zeger, 1986) and  $p \lim$  denotes the limit in probability (if it exists).

Since  $\sqrt{n}(\hat{\boldsymbol{\beta}} - \boldsymbol{\beta})$  converges in distribution to a zero-mean Gaussian distribution and  $1/n \sum_{i=1}^n W_i(x_1, x_2|r_i, s_i, b)\mathbf{X}_i$  is bounded, then the second term of (1) is also tight, proving  $Z_{loc}(x_1, x_2|b)$  is tight.

Further, since  $\sqrt{n}(\hat{\boldsymbol{\beta}} - \boldsymbol{\beta})$  is asymptotically equivalent to,  $\mathbf{A}^{-1}(\boldsymbol{\beta}) \frac{1}{\sqrt{n}} U_{\boldsymbol{\beta}}(\boldsymbol{\beta})$ , then  $Z_{loc}(x_1, x_2|b)$  is asymptotically equivalent to,

$$\begin{aligned} \tilde{Z}_{loc}(x_1, x_2|b) &= \frac{1}{\sqrt{n}} \sum_{i=1}^n \Psi_i(x_1, x_2|b) \\ &= \frac{1}{\sqrt{n}} \sum_{i=1}^n W_i(x_1, x_2|b) e_i + \frac{1}{\sqrt{n}} \left( \frac{1}{n} \sum_{i=1}^n W_i(x_1, x_2|b) \mathbf{X}_i \right) \mathbf{A}^{-1}(\boldsymbol{\beta}) U_{\boldsymbol{\beta}}(\boldsymbol{\beta}) \\ &= \frac{1}{\sqrt{n}} \sum_{i=1}^n \left[ W_i(x_1, x_2|b) e_i + \left( \frac{1}{n} \sum_{i=1}^n W_i(x_1, x_2|b) \mathbf{X}_i \right) \mathbf{A}^{-1}(\boldsymbol{\beta}) U_{i\boldsymbol{\beta}}(\boldsymbol{\beta}) \right]. \end{aligned}$$

For fixed  $(x_1, x_2)$ ,  $\tilde{Z}_{loc}(x_1, x_2|b)$  is a sum of  $n$  independent and identically distributed zero-mean random vectors. By the multivariate central limit theorem, the finite-dimensional distributions of  $\tilde{Z}_{loc}(x_1, x_2|b)$  are asymptotically zero-mean gaussian, implying the same for  $Z_{loc}(x_1, x_2|b)$ . This fact, together with the tightness of  $Z_{loc}(x_1, x_2|b)$ , implies that  $Z_{loc}(x_1, x_2|b)$  converges weakly to a zero-mean Gaussian process with covariance function  $E(\Psi_1(x_{1a}, x_{2a}|b)\Psi_1(x_{1b}, x_{2b}|b))$  at  $((x_{1a}, x_{2a}|b), (x_{1b}, x_{2b}|b))$  as  $n \rightarrow \infty$ .

Next we will establish the weak distribution of  $\hat{Z}_{loc}(x_1, x_2|b)$  which is defined as

$$\hat{Z}_{loc}(x_1, x_2|b) = \frac{1}{\sqrt{n}} \sum_{i=1}^n \left[ W_i(x_1, x_2|b)\hat{e}_i + \nu(x_1, x_2|b)\mathbf{I}^{-1}(\hat{\boldsymbol{\beta}})U_{i\beta}(\hat{\boldsymbol{\beta}}) \right] G_i, \quad (2)$$

where

$$\nu(x_1, x_2|b) = - \sum_{i=1}^n W_i(x_1, x_2|b)\partial\mu/\partial\boldsymbol{\beta} = - \sum_{i=1}^n W_i(x_1, x_2|b)\mathbf{X}_i.$$

$\mathbf{I}(\boldsymbol{\beta}) = -\partial U_\beta/\partial\boldsymbol{\beta}$  and  $G_i$  ( $i = 1, \dots, n$ ) are independent mean 0 and variance 1 random variables that are also independent of  $(Y_i, \mathbf{X}_i, s_i, r_i)$ . Conditional on the data  $\{(Y_i, \mathbf{X}_i, r_i, s_i), i = 1, \dots, n\}$ , the only random components in  $\hat{Z}_{loc}(x_1, x_2|b)$  are  $(G_1, \dots, G_n)$ . Thus, it follows from the multivariate central limit theorem that, conditional on the data, the finite-dimensional distributions of  $\hat{Z}_{loc}(x_1, x_2|b)$  are asymptotically zero-mean normal. Since  $\hat{Z}_{loc}(x_1, x_2|b)$  consists of monotone functions,  $P_{2i}(x_1, x_2|b) = [W_i(x_1, x_2|b)\hat{e}_i + \nu(x_1, x_2|b)\mathbf{I}^{-1}(\hat{\boldsymbol{\beta}})U_{i\beta}(\hat{\boldsymbol{\beta}})]$ , in  $(x_1, x_2)$ , which are manageable, the functional central limit theorem implies that  $\hat{Z}_{loc}(x_1, x_2|b)$  is tight. Define

$$\hat{\Psi}_i(x_1, x_2|b) = W_i(x_1, x_2, b)\hat{e}_i + \left( \frac{1}{n} \sum_{i=1}^n W_i(x_1, x_2|r_i, s_i, b)\mathbf{X}_i \right) \left[ \frac{1}{n}\mathbf{I}(\hat{\boldsymbol{\beta}}) \right]^{-1} U_{i\beta}(\hat{\boldsymbol{\beta}}).$$

The conditional covariance function of  $\hat{Z}_{loc}(x_1, x_2|b)$  at  $((x_{1a}, x_{2a}|b), (x_{1b}, x_{2b}|b))$  is,

$$\frac{1}{n} \sum_{i=1}^n \hat{\Psi}_i(x_{1a}, x_{2a}|b) \hat{\Psi}_i(x_{1b}, x_{2b}|b)$$

which converges to  $E(\Psi_1(x_{1a}, x_{2a}|b)\Psi_1(x_{1b}, x_{2b}|b))$ , the deterministic limiting covariance function of  $Z_{loc}(x_1, x_2|b)$ , as  $n \rightarrow \infty$  by the law of large numbers, given  $\hat{\Psi}_i(x_{1a}, x_{2a}|b)$  are *iid* and existence of  $\left[\frac{1}{n}\mathbf{I}(\hat{\beta})\right]^{-1}$ . Therefore,  $Z_{loc}(x_1, x_2|b)$  and  $\hat{Z}_{loc}(x_1, x_2|b)$  converge to the same limiting zero-mean Gaussian process.

#### REFERENCES

- Billias, Y., Gu, M. and Ying, Z. (1997). Towards a general asymptotic theory for cox model with staggered entry. *The Annals of Statistics* **25**, 662–682.
- Liang, K. and Zeger, S. (1986). Longitudinal data analysis using generalized linear models. *Biometrika* **73**, 13–22.
- Pollard, D. (1990). *Empirical Processes: Theory and Applications*. NSF-CBMS Regional Conference Series in Probability and Statistics 2, Institute of Mathematical Sciences, Hayward, CA.

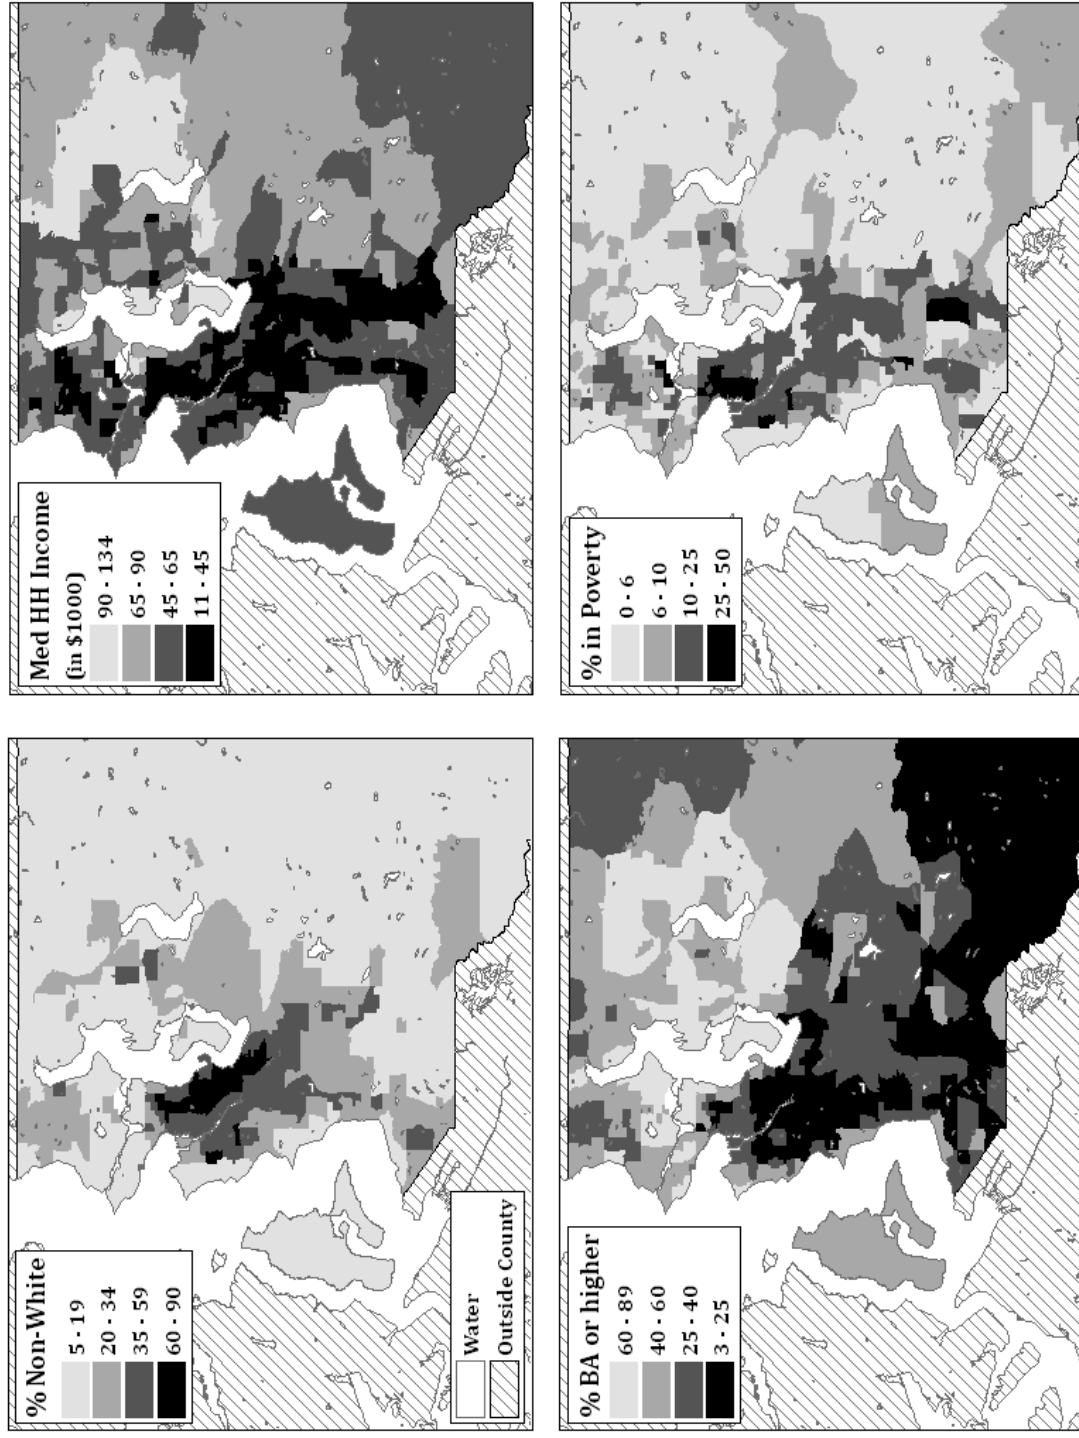

**Web Figure 1.** Assessing spatial clustering of female BMI cluster in King County WA. Part A displays the raw mean census tract BMI and Part B and C display displays the areas with statistically significant spatial clustering from the unadjusted analyses and then adjusting for all individual and area-level covariates.

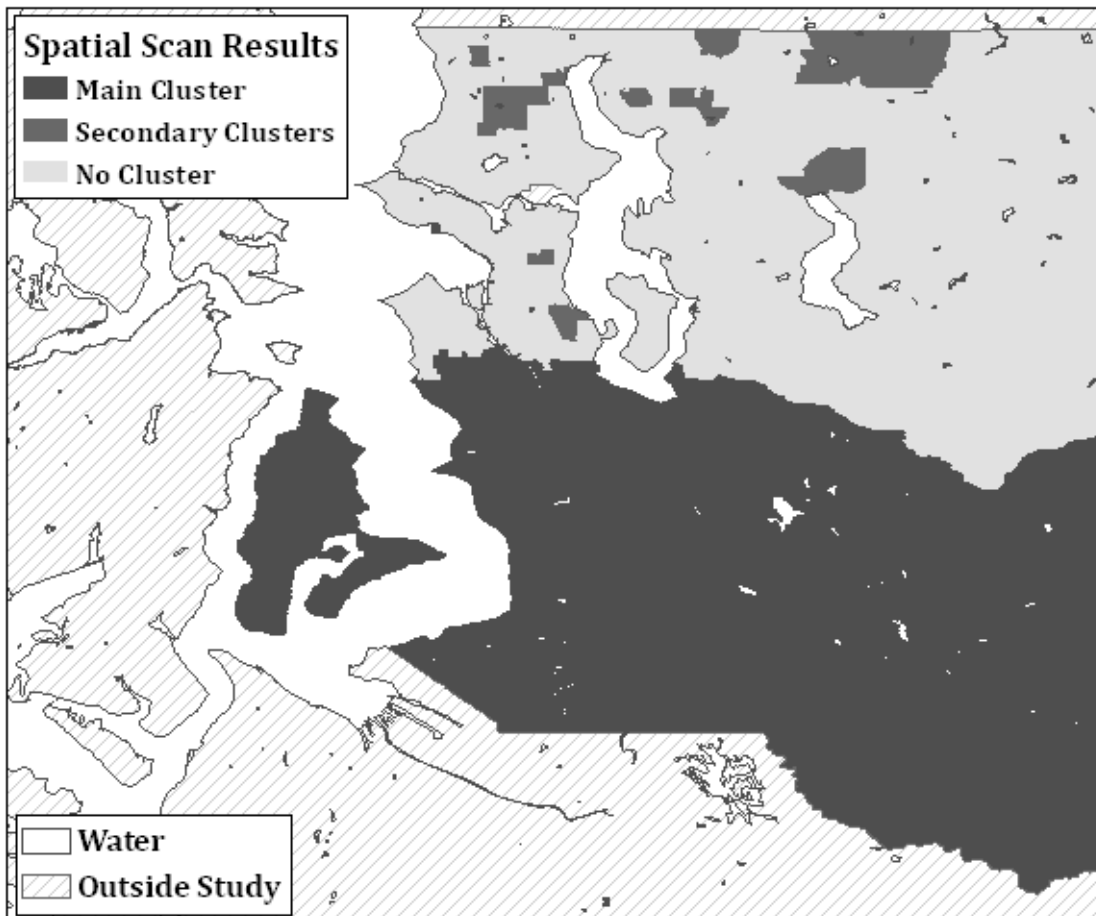

**Web Figure 2.** Assessing spatial clustering of female BMI cluster in King County WA. Apply the unweighted spatial scan assuming a normal model and no covariate adjustment using SaTScan<sup>TM</sup> software ([www.satscan.org](http://www.satscan.org))

**Web Table 1**

*Type I error calculations of the Weighted Cumulative Geographic Residual Test for different number of regions and weights.*

| $\nu$ | $\sigma$ | Type I error |
|-------|----------|--------------|
| 1     | 1        | 0.060        |
| 1     | 5        | 0.052        |
| 1     | 10       | 0.043        |
| 1     | 20       | 0.052        |
| 1     | 30       | 0.060        |
| 10    | 1        | 0.049        |
| 10    | 5        | 0.049        |
| 10    | 10       | 0.050        |
| 10    | 20       | 0.048        |
| 10    | 30       | 0.052        |
| 20    | 1        | 0.069        |
| 20    | 5        | 0.054        |
| 20    | 10       | 0.044        |
| 20    | 20       | 0.051        |
| 20    | 30       | 0.046        |
| 30    | 1        | 0.052        |
| 30    | 5        | 0.041        |
| 30    | 10       | 0.063        |
| 30    | 20       | 0.053        |
| 30    | 30       | 0.065        |

Model Framework:  $Y_i \sim N(0, 1)$  with weight  $w_i \sim \nu + \sigma * Uniform(0, 1)$  and  $i = 1, \dots, N$

$$\text{Type I error} = \frac{1}{1000} \sum_{j=1}^{1000} I(P - val_j < 0.05)$$

**Web Table 2**

*Type I error calculations of the Weighted Cumulative Geographic Residual Test when weights are variable.*

| N  | weight | Type I error | N   | weight | Type I error |
|----|--------|--------------|-----|--------|--------------|
| 25 | 1      | 0.029        | 100 | 1      | 0.040        |
| 25 | 20     | 0.016        | 100 | 20     | 0.055        |
| 25 | 40     | 0.034        | 100 | 40     | 0.042        |
| 25 | 60     | 0.020        | 100 | 60     | 0.029        |
| 25 | 80     | 0.037        | 100 | 80     | 0.042        |
| 36 | 1      | 0.035        | 121 | 1      | 0.040        |
| 36 | 20     | 0.038        | 121 | 20     | 0.050        |
| 36 | 40     | 0.033        | 121 | 40     | 0.049        |
| 36 | 60     | 0.032        | 121 | 60     | 0.044        |
| 36 | 80     | 0.034        | 121 | 80     | 0.050        |
| 49 | 1      | 0.043        | 144 | 1      | 0.045        |
| 49 | 20     | 0.041        | 144 | 20     | 0.059        |
| 49 | 40     | 0.043        | 144 | 40     | 0.047        |
| 49 | 60     | 0.049        | 144 | 60     | 0.045        |
| 49 | 80     | 0.033        | 144 | 80     | 0.043        |
| 64 | 1      | 0.039        | 169 | 1      | 0.041        |
| 64 | 20     | 0.042        | 169 | 20     | 0.048        |
| 64 | 40     | 0.051        | 169 | 40     | 0.050        |
| 64 | 60     | 0.034        | 169 | 60     | 0.046        |
| 64 | 80     | 0.054        | 169 | 80     | 0.049        |
| 81 | 1      | 0.052        | 225 | 1      | 0.046        |
| 81 | 20     | 0.042        | 225 | 20     | 0.040        |
| 81 | 40     | 0.046        | 225 | 40     | 0.039        |
| 81 | 60     | 0.061        | 225 | 60     | 0.040        |
| 81 | 80     | 0.049        | 225 | 80     | 0.058        |

Model Framework:  $Y_i \sim N(0, 1)$  with weight  $w_i$  and  $i = 1, \dots, N$

$$\text{Type I error} = \frac{1}{1000} \sum_{j=1}^{1000} I(P - val_j < 0.05)$$



**Web Table 3**

*Power calculations of the Cumulative Geographic Residual Test for adjusted and unadjusted area-level covariate analyses when spatial clustering does not exist independent of area-level covariate and outcome relationship ( $c=0$ )*

|                | $\beta$ | Unadjusted<br>Power | Adjusted<br>Power |
|----------------|---------|---------------------|-------------------|
| Moderate       | -2      | 0.047               | 0.052             |
| Dependence     | -1      | 0.047               | 0.056             |
| $\gamma = 0.5$ | 0       | 0.039               | 0.045             |
|                | 1       | 0.066               | 0.060             |
|                | 2       | 0.104               | 0.048             |
|                | 3       | 0.126               | 0.035             |
|                | 4       | 0.146               | 0.060             |
| Strong         | -2      | 0.058               | 0.052             |
| Dependence     | -1      | 0.068               | 0.036             |
| $\gamma = 1.0$ | 0       | 0.053               | 0.049             |
|                | 1       | 0.214               | 0.055             |
|                | 2       | 0.330               | 0.043             |
|                | 3       | 0.364               | 0.049             |
|                | 4       | 0.373               | 0.037             |

Stage 1: Unadjusted Power is the proportion of statistically significant clusters when  $E(Y_i|Z_i^*) = \beta\gamma Z_i^*$

Stage 2: Adjusted Power is the proportion of statistically significant clusters when  $E(Y_i|Z_i^*, X_i) = \beta X_i$
